# Supplementary material for: Making Connections: Mesenchymal Stem Cells Manifold Ways to Interact with Neurons
Source: MDPI journal article supplement (doi:10.3390/ijms23105791), 2022-05-21
Supplement: s1 [file s1]

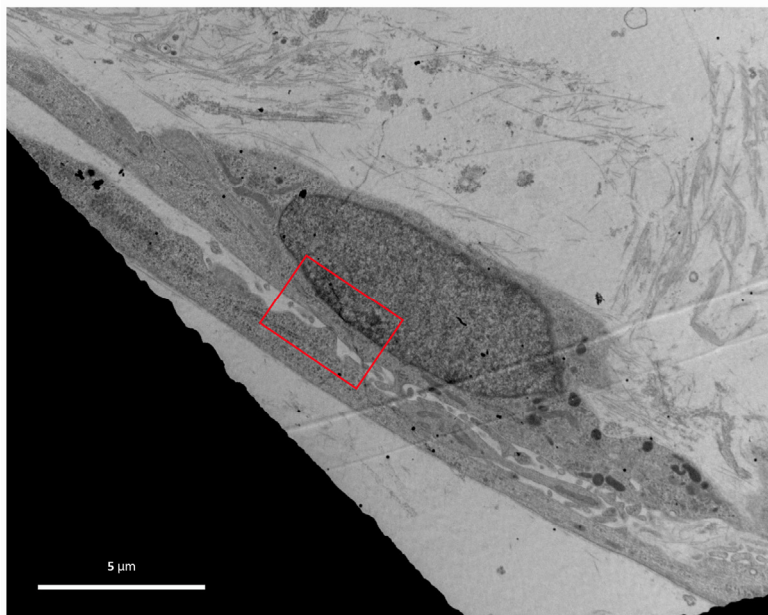

**Fig. 1a**

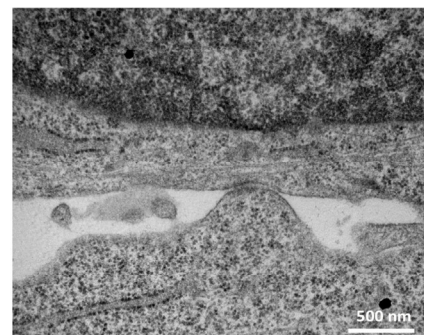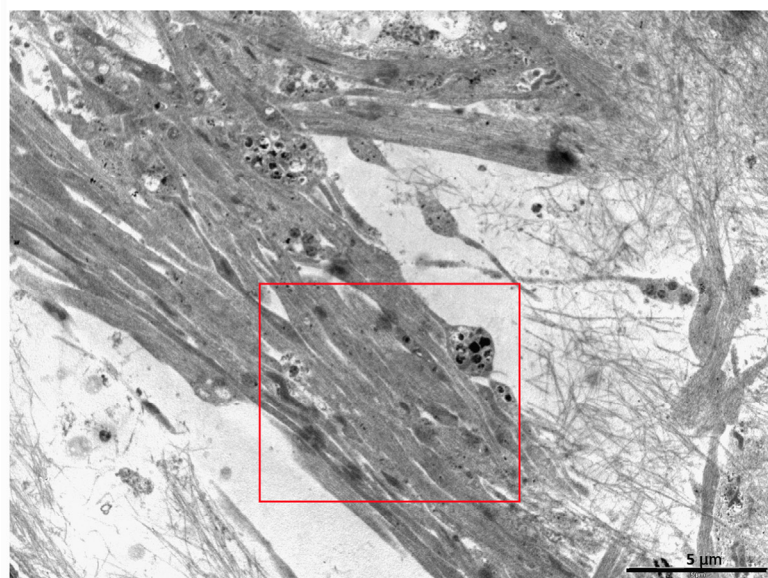

**Fig. 2b**

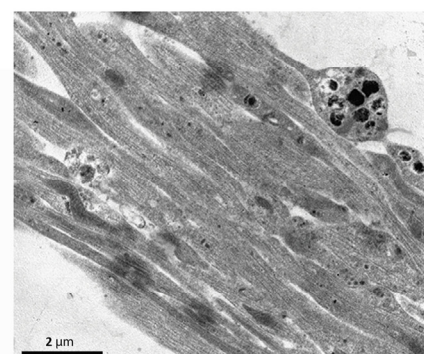

**Figure S1.** Low magnification images corresponding respectively to Fig. 1a (top) and Fig. 2b (bottom).
